# Supplementary material
Source: MDPI journal article supplement (https://www.mdpi.com/2076-3417/14/5/2048)
Supplement: s1 [file s1]

**Table S1.** Distribution and molecular identification of 16 endophytic strains isolated from *Amentotaxus yunnanensis*

| Endophyte code | Plant organ | GenBank accession number | Closest match                                               | Percentage identity (%) |
|----------------|-------------|--------------------------|-------------------------------------------------------------|-------------------------|
| AQF1           | Stem        | OP020697                 | <i>Purpureocillium lilacinum</i> NRRL 895 <sup>T</sup>      | 99.62                   |
| AQF2           | Leaf        | OP020698                 | <i>Aspergillus assiutensis</i> AUMC 5748 <sup>T</sup>       | 100.0                   |
| AQF3           | Root        | OP020699                 | <i>Diaporthe hongkongensis</i> CBS 115448 <sup>T</sup>      | 99.03                   |
| AQF4           | Root        | OP020700                 | <i>Fusarium foetens</i> CBS 110286 <sup>T</sup>             | 99.39                   |
| AQF5           | Root        | OP020701                 | <i>Diaporthe australiana</i> BRIP 66145 <sup>T</sup>        | 95.33                   |
| AQF6           | Root        | OP020702                 | <i>Fusarium foetens</i> CBS 110286 <sup>T</sup>             | 99.39                   |
| AQF7           | Root        | OP020703                 | <i>Aspergillus austwickii</i> DTO 228-F7 <sup>T</sup>       | 99.64                   |
| AQF8           | Root        | OP020704                 | <i>Penicillium crustosum</i> FRR 1669 <sup>T</sup>          | 100.00                  |
| AQF9           | Root        | OP020705                 | <i>Fusarium perseae</i> CPC 26829 <sup>T</sup>              | 99.18                   |
| AQF13          | Stem        | OP020706                 | <i>Penicillium crustosum</i> FRR 1669 <sup>T</sup>          | 100.00                  |
| AQF15          | Stem        | OP020707                 | <i>Neopestalotiopsis formicarum</i> CBS 362.72 <sup>T</sup> | 99.80                   |
| AQF16          | Stem        | OP020708                 | <i>Simplicillium obclavatum</i> CBS 311.74 <sup>T</sup>     | 99.08                   |
| AQF18          | Stem        | OP020709                 | <i>Fusarium macrosporum</i> CPC 28191 <sup>T</sup>          | 99.15                   |
| AQF19          | Stem        | OP020710                 | <i>Penicillium citrinum</i> NRRL 1841 <sup>T</sup>          | 99.61                   |
| AQF21          | Leaf        | OP020711                 | <i>Penicillium crustosum</i> FRR 1669 <sup>T</sup>          | 100.00                  |
| AQF23          | Leaf        | OP020712                 | <i>Fusarium solani</i> MFLUCC 17-2615                       | 98.83                   |

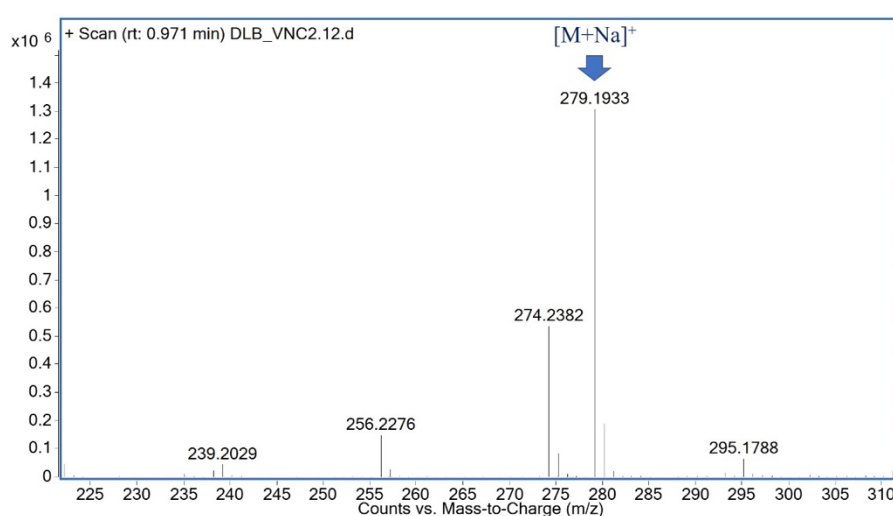
**Figure S1.** HRESITOF mass spectrum of compound 1

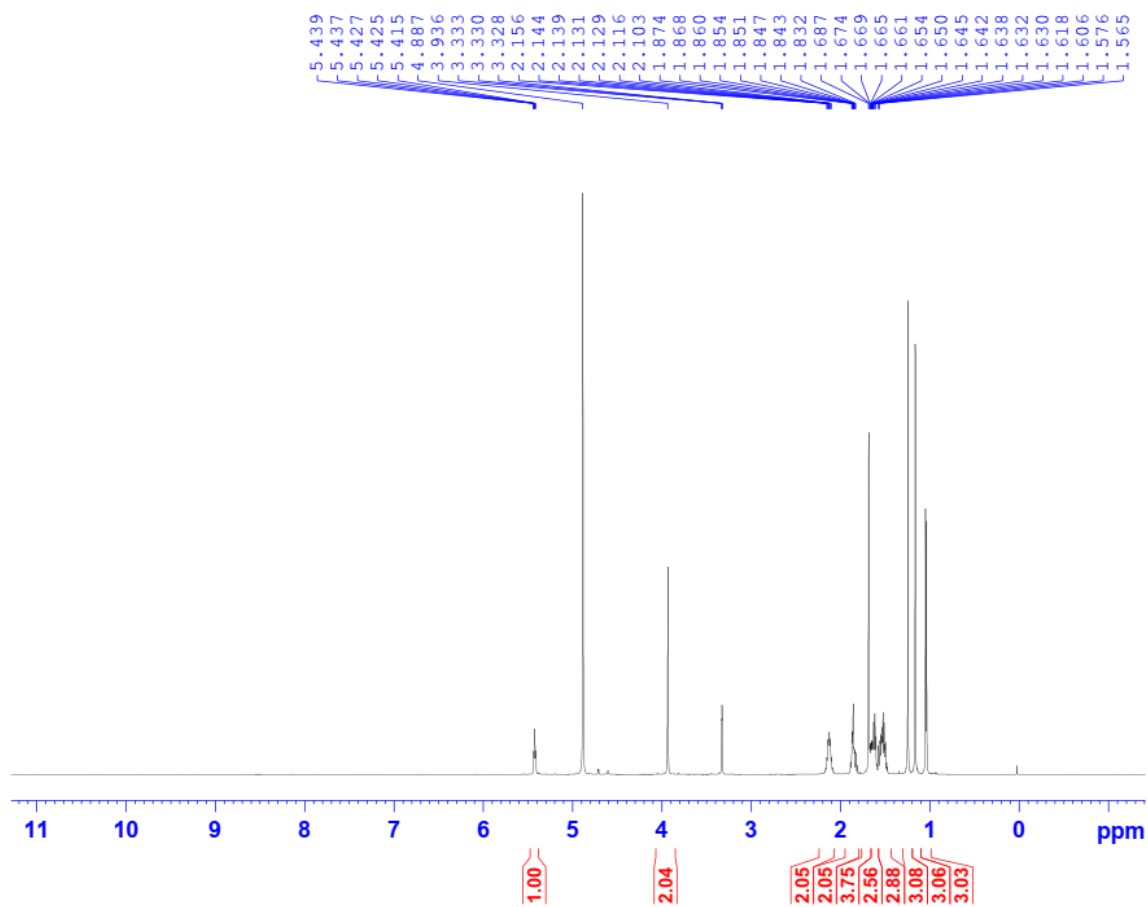Figure S2. <sup>1</sup>H NMR spectrum (CD<sub>3</sub>OD, 600 MHz) of compound 1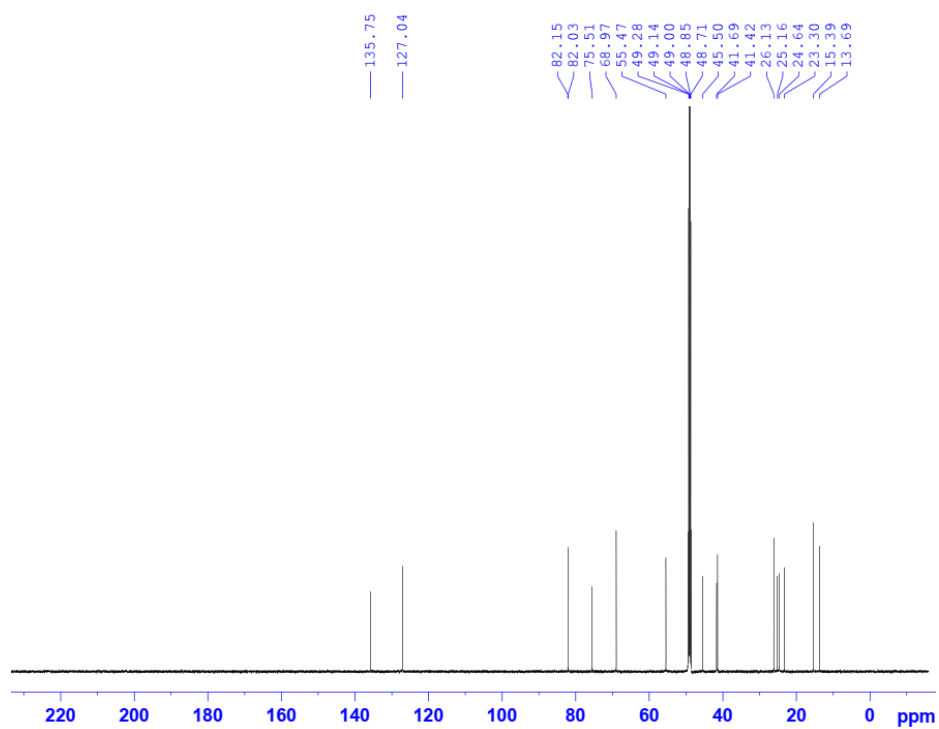Figure S3. <sup>13</sup>C NMR spectrum (CD<sub>3</sub>OD, 150 MHz) of compound 1

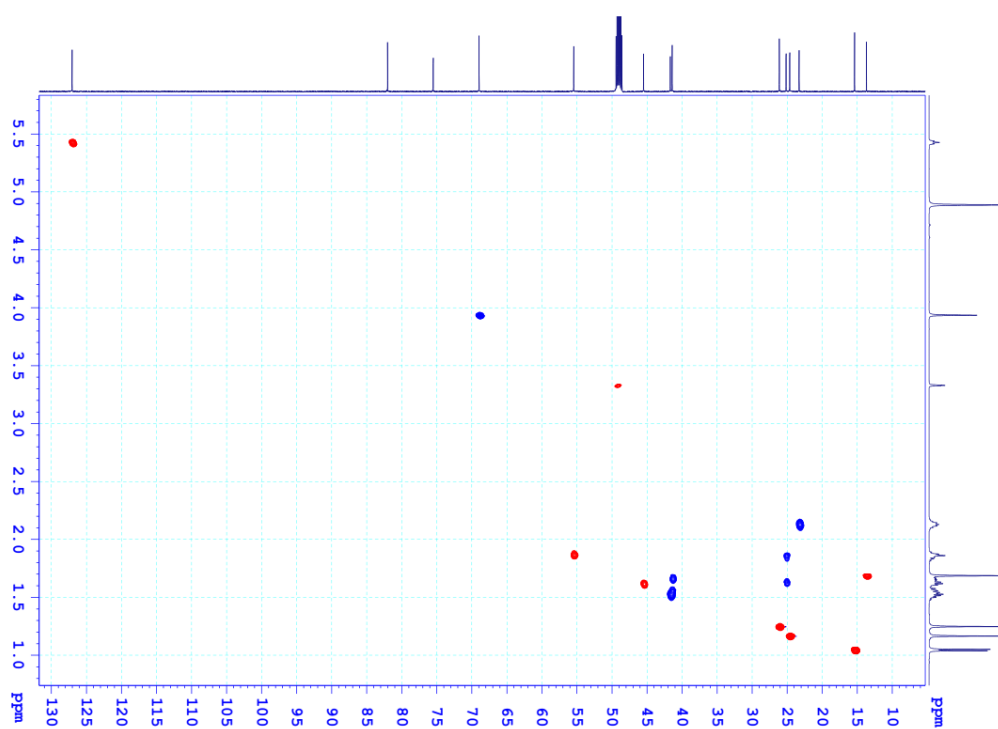

Figure S4. HSQC spectrum (CD<sub>3</sub>OD, 600 MHz) of compound 1

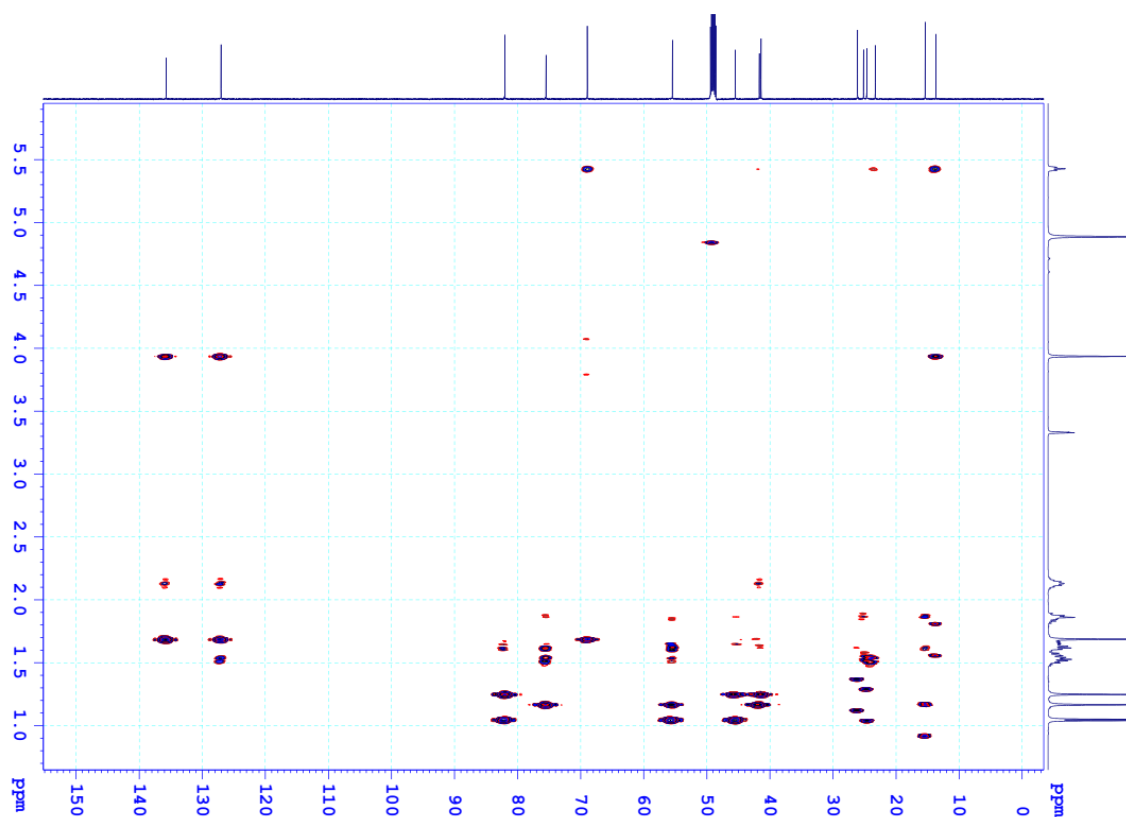

Figure S5. HMBC spectrum (CD<sub>3</sub>OD, 600 MHz) of compound 1

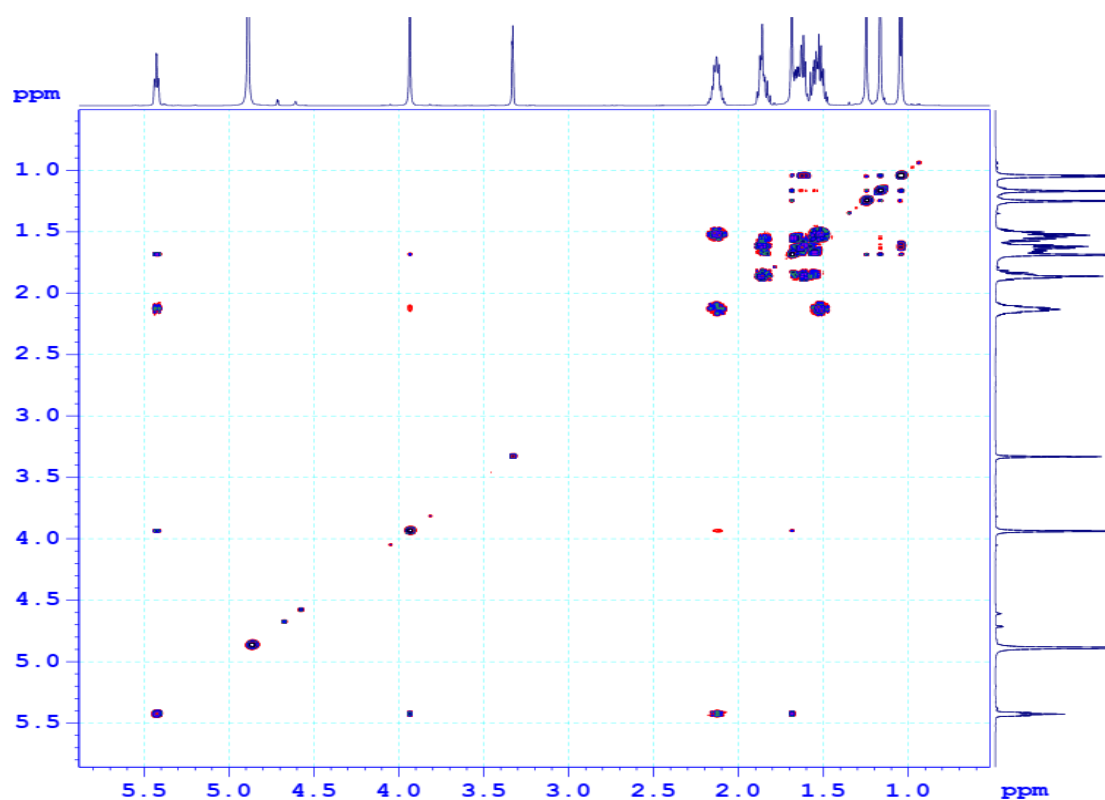

Figure S6. COSY spectrum (CD<sub>3</sub>OD, 600 MHz) of compound 1

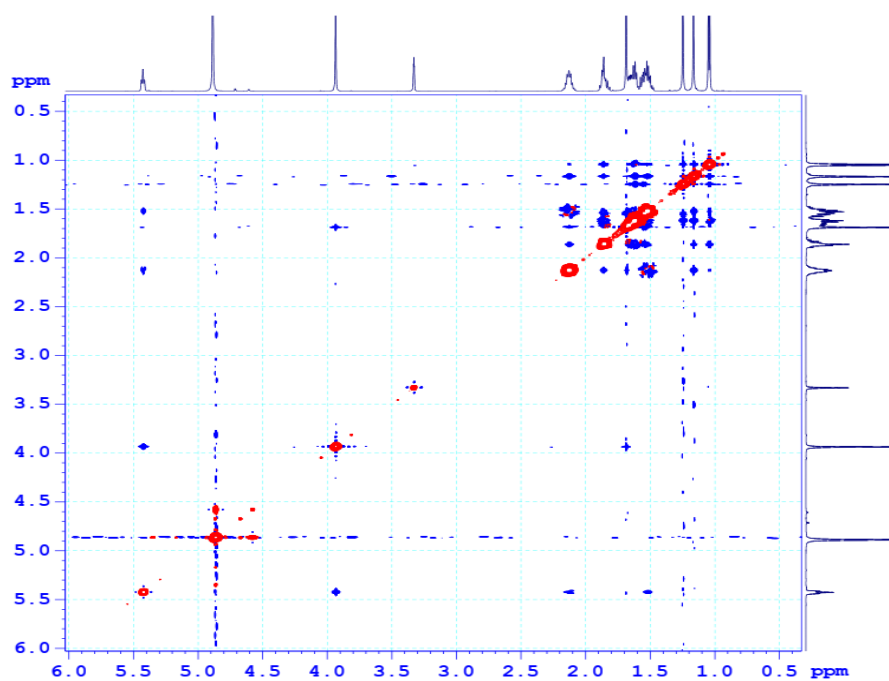

Figure S7. NOESY spectrum (CD<sub>3</sub>OD, 600 MHz) of compound 1

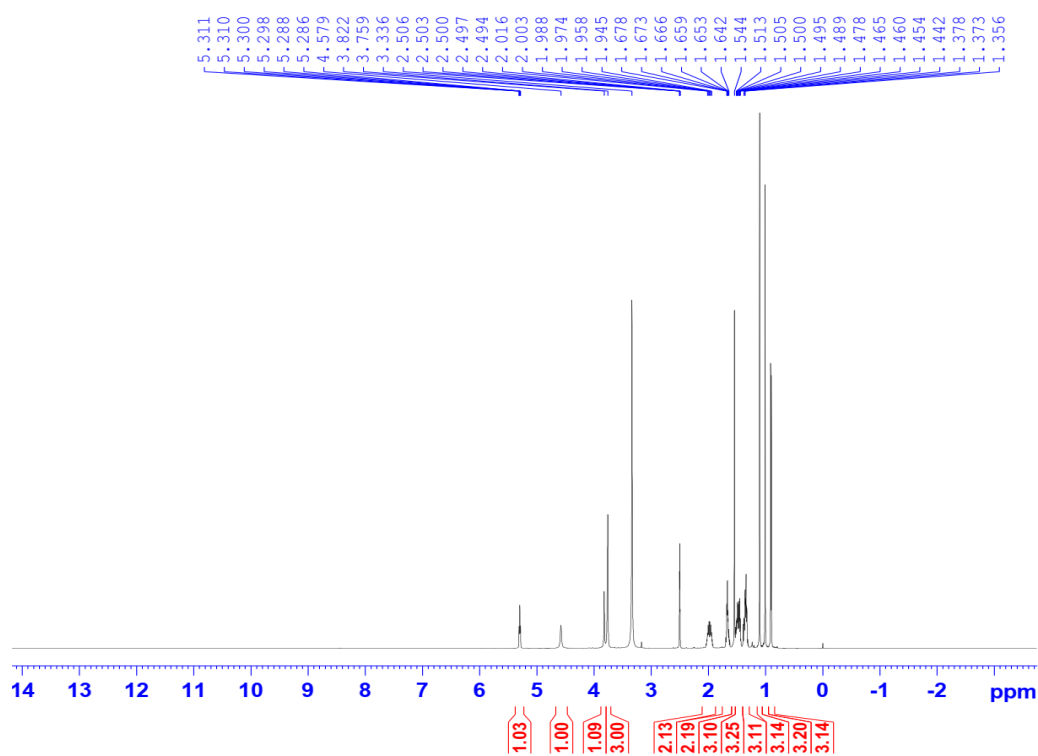

Figure S8. <sup>1</sup>H NMR spectrum (DMSO-d<sub>6</sub>, 600 MHz) of compound 1

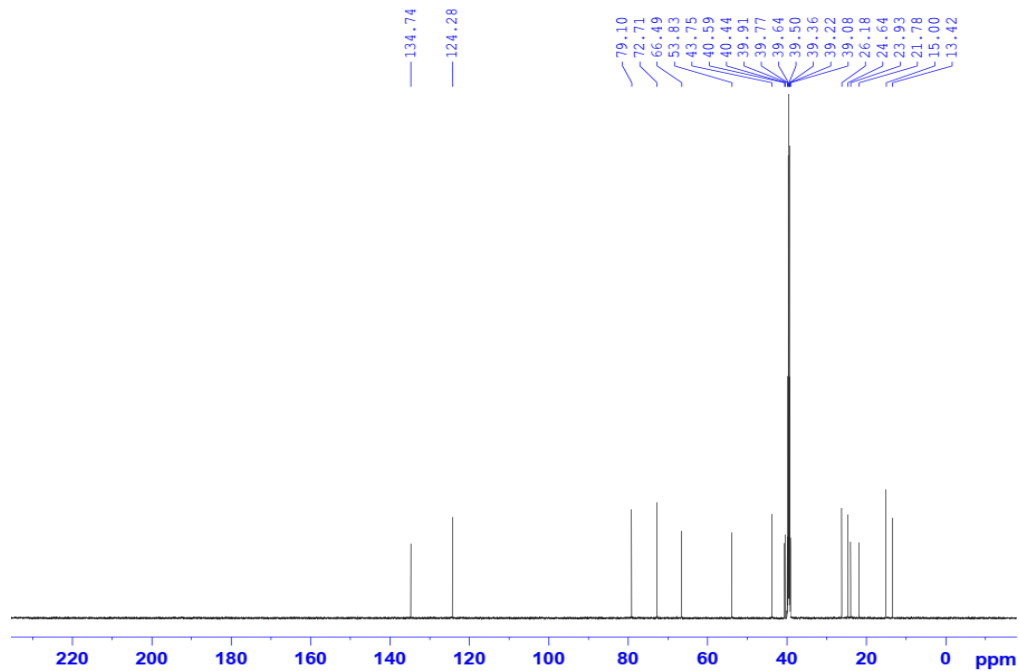

Figure S9. <sup>13</sup>C NMR spectrum (DMSO-d<sub>6</sub>, 150 MHz) of compound 1

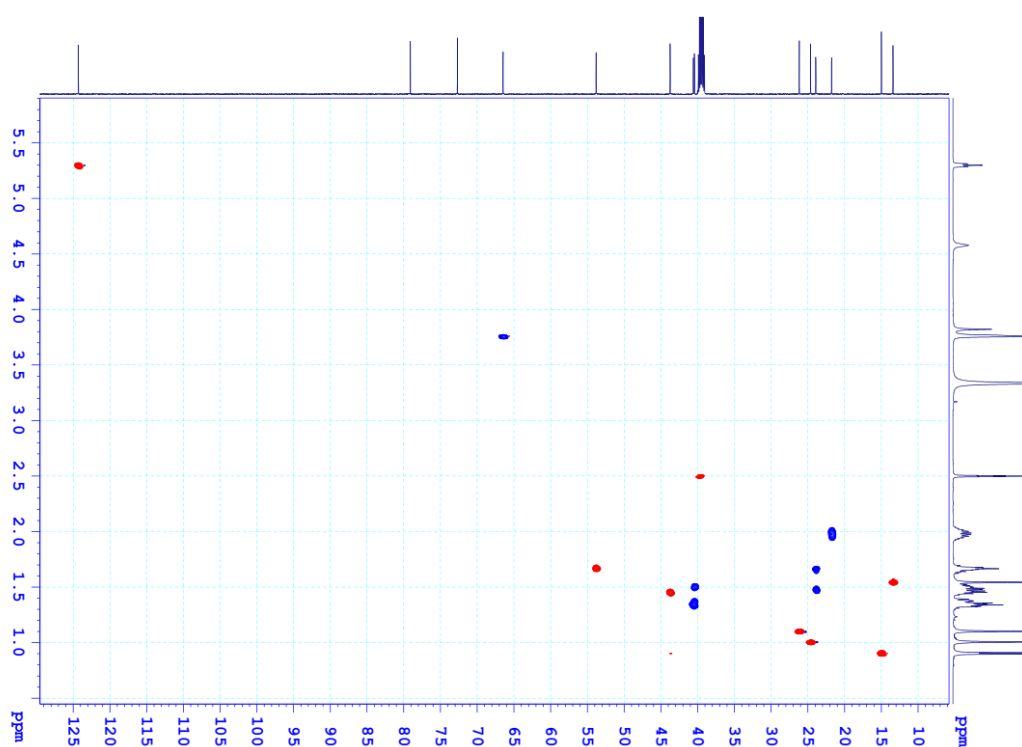

Figure S10. HSQC spectrum (DMSO- $d_6$ , 600 MHz) of compound 1

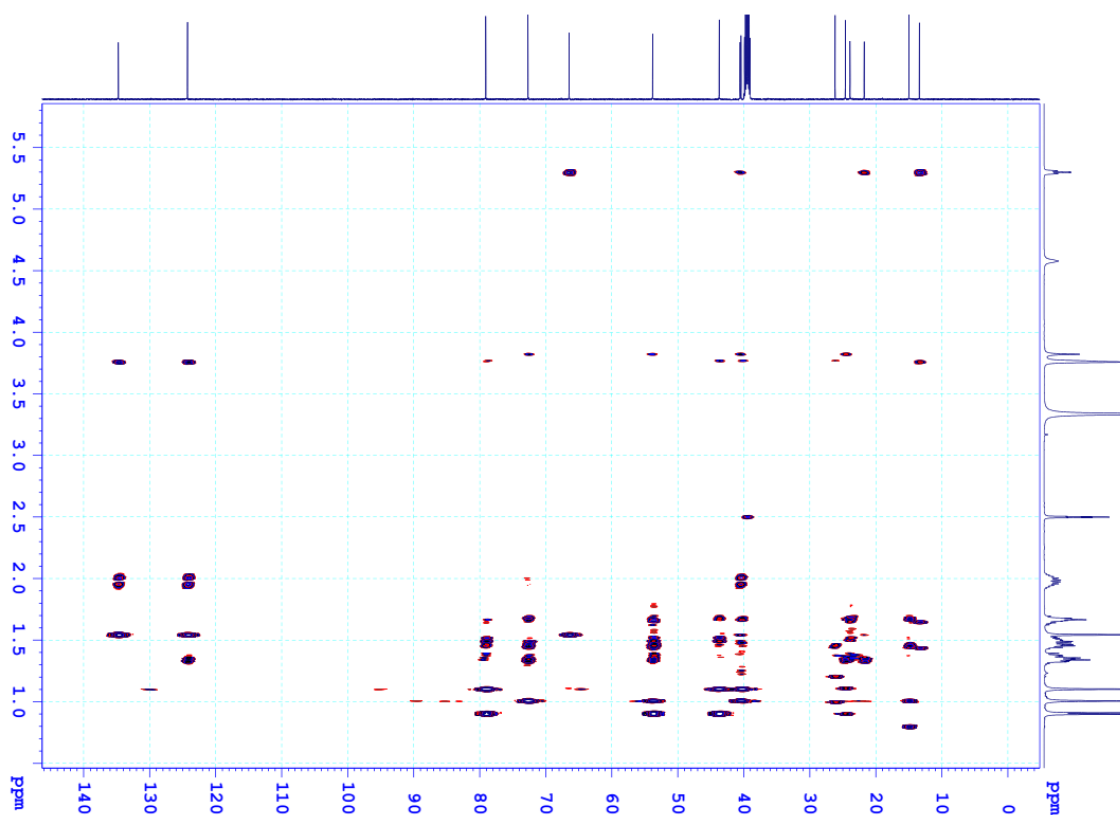

Figure S11. HMBC spectrum (DMSO- $d_6$ , 600 MHz) of compound 1
